# Supplementary material for: Navigating the microbial community in the trachea-oropharynx of breast cancer patients with or without neoadjuvant chemotherapy (NAC) via endotracheal tube: has NAC caused any change?
Source: PubMed Central journal article supplement (PMC10676715; doi:10.7717/peerj.16366), 2023-11-23
Supplement: peerj-11-16366-s004.pdf [file peerj-11-16366-s004.pdf]

# Within NAC group; stage2 vs stage 3

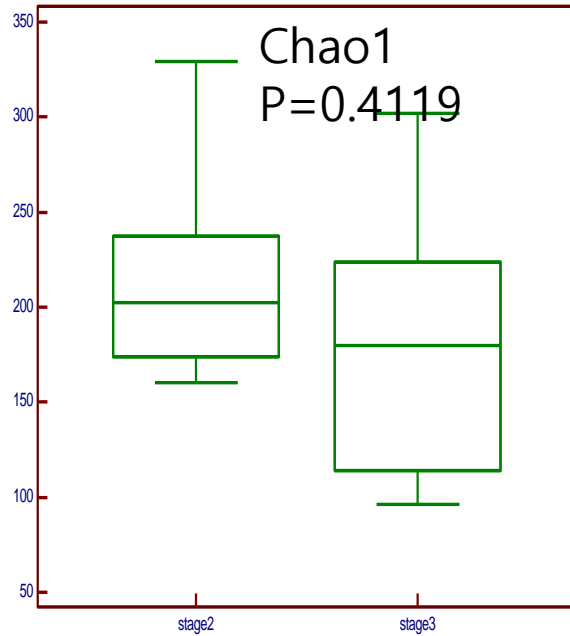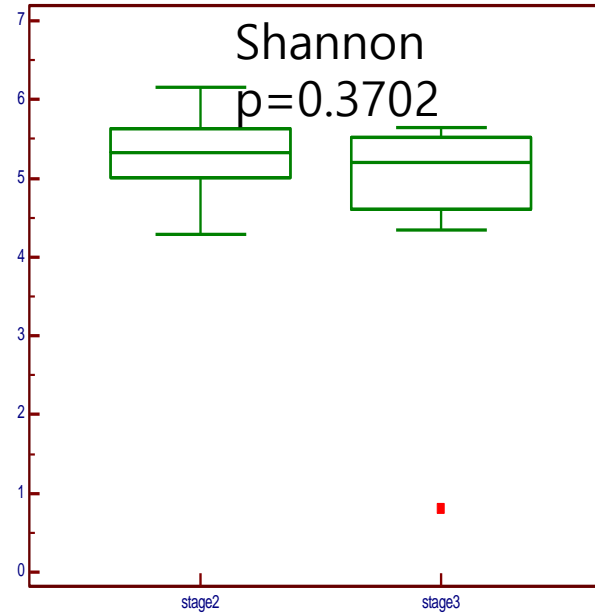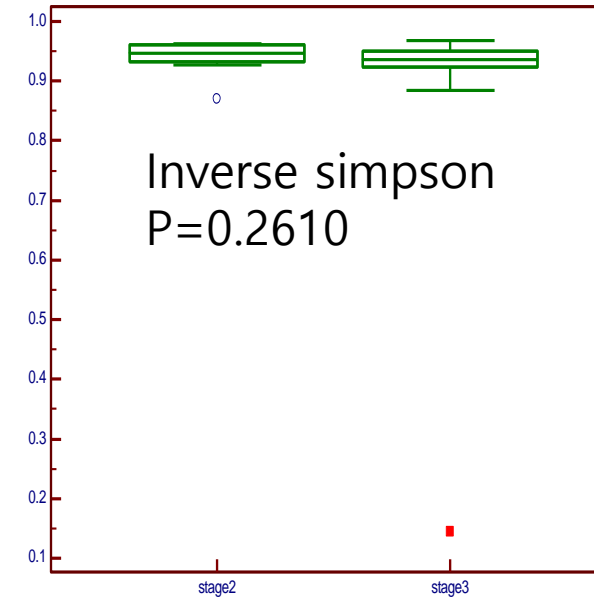

|                       | Sample 1             | Sample 2             |
|-----------------------|----------------------|----------------------|
| Sample size           | 9                    | 11                   |
| Lowest value          | 160.2000             | 96.0000              |
| Highest value         | 329.5000             | 301.7000             |
| Median                | 202.2000             | 180.1000             |
| 95% CI for the median | 169.2934 to 241.5204 | 105.7929 to 236.0104 |
| Interquartile range   | 173.7000 to 237.1750 | 113.8750 to 223.9750 |

  

|                              |            |
|------------------------------|------------|
| Average rank of first group  | 11.7778    |
| Average rank of second group | 9.4545     |
| Mann-Whitney U               | 38.00      |
| Test statistic W             | 104.000    |
| Two-tailed probability       | P = 0.4119 |

|                       | Sample 1         | Sample 2         |
|-----------------------|------------------|------------------|
| Sample size           | 9                | 11               |
| Lowest value          | 4.2859           | 0.7996           |
| Highest value         | 6.1582           | 5.6491           |
| Median                | 5.3206           | 5.2058           |
| 95% CI for the median | 4.7393 to 5.7053 | 4.4966 to 5.5254 |
| Interquartile range   | 5.0039 to 5.6248 | 4.5999 to 5.5159 |

  

|                              |            |
|------------------------------|------------|
| Average rank of first group  | 11.8889    |
| Average rank of second group | 9.3636     |
| Mann-Whitney U               | 37.00      |
| Test statistic W             | 103.000    |
| Two-tailed probability       | P = 0.3702 |

|                       | Sample 1         | Sample 2         |
|-----------------------|------------------|------------------|
| Sample size           | 9                | 11               |
| Lowest value          | 0.8701           | 0.1437           |
| Highest value         | 0.9630           | 0.9678           |
| Median                | 0.9471           | 0.9362           |
| 95% CI for the median | 0.9278 to 0.9622 | 0.9165 to 0.9527 |
| Interquartile range   | 0.9325 to 0.9607 | 0.9242 to 0.9507 |

  

|                              |            |
|------------------------------|------------|
| Average rank of first group  | 12.2222    |
| Average rank of second group | 9.0909     |
| Mann-Whitney U               | 34.00      |
| Test statistic W             | 100.000    |
| Two-tailed probability       | P = 0.2610 |

# Within non-NAC group; stage1 vs stage 2

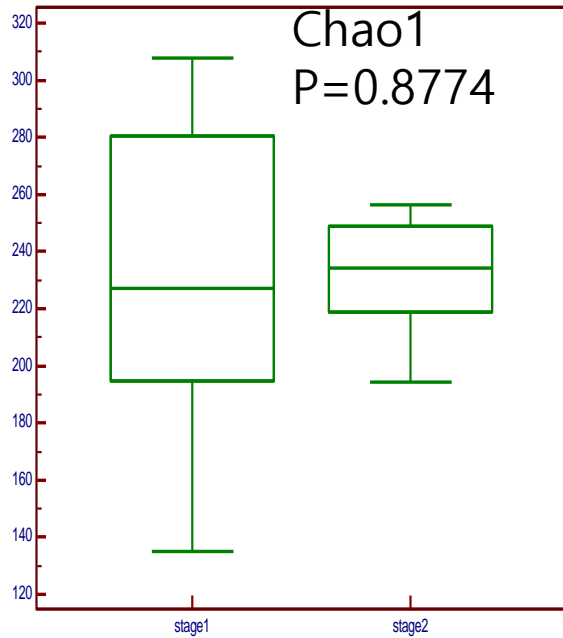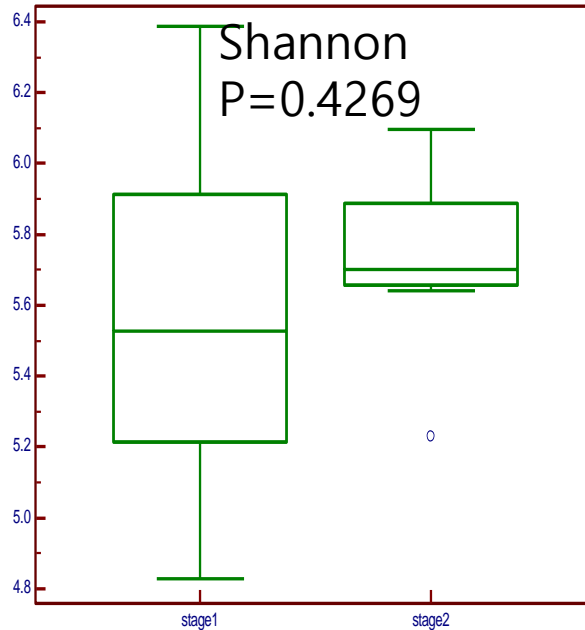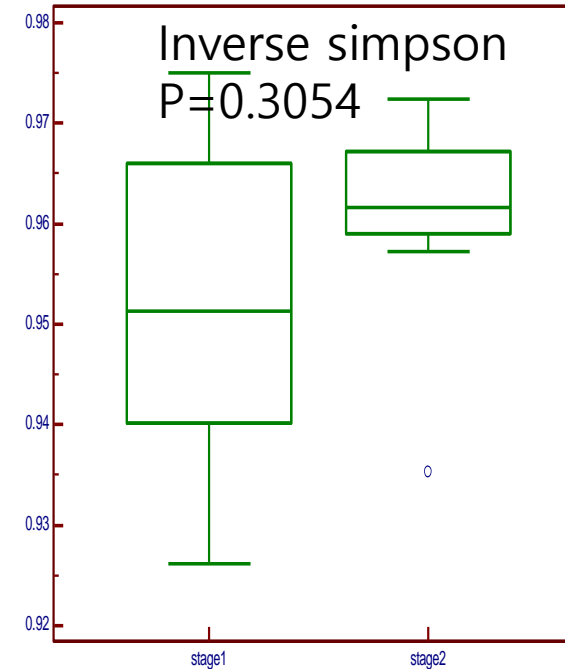

Mann-Whitney test (independent samples)

| Sample 1                                       |                      | Sample 2                              |                      |
|------------------------------------------------|----------------------|---------------------------------------|----------------------|
| Variable                                       | stage1               | Variable                              | stage2               |
| Sample size                                    | 12                   | Sample size                           | 8                    |
| Lowest value                                   | 135.0000             | Lowest value                          | 194.2000             |
| Highest value                                  | 307.9000             | Highest value                         | 256.5000             |
| Median                                         | 227.3000             | Median                                | 234.2500             |
| 95% CI for the median                          | 183.7190 to 293.1134 | 95% CI for the median                 | 209.6040 to 255.5271 |
| Interquartile range                            | 194.5500 to 280.4500 | Interquartile range                   | 218.8500 to 248.9000 |
| <b>Mann-Whitney test (independent samples)</b> |                      |                                       |                      |
| Average rank of first group                    | 10.3333              | Average rank of second group          | 10.7500              |
| Mann-Whitney U                                 | 46.00                | Test statistic Z (corrected for ties) | 0.154                |
| Two-tailed probability                         | P = 0.8774           |                                       |                      |

Data comparison graph

Mann-Whitney test (independent samples)

| Sample 1                                       |                  | Sample 2                     |                  |
|------------------------------------------------|------------------|------------------------------|------------------|
| Variable                                       | stage1           | Variable                     | stage2           |
| Sample size                                    | 12               | Sample size                  | 8                |
| Lowest value                                   | 4.8279           | Lowest value                 | 5.2286           |
| Highest value                                  | 6.3871           | Highest value                | 6.0956           |
| Median                                         | 5.5288           | Median                       | 5.7013           |
| 95% CI for the median                          | 5.1828 to 5.9695 | 95% CI for the median        | 5.5638 to 6.0175 |
| Interquartile range                            | 5.2142 to 5.9115 | Interquartile range          | 5.6554 to 5.8872 |
| <b>Mann-Whitney test (independent samples)</b> |                  |                              |                  |
| Average rank of first group                    | 9.5833           | Average rank of second group | 11.8750          |
| Mann-Whitney U                                 | 37.00            | Test statistic W             | 115.000          |
| Two-tailed probability                         | P = 0.4269       |                              |                  |

Data comparison graph

Mann-Whitney test (independent samples)

| Sample 1                                       |                  | Sample 2                     |                  |
|------------------------------------------------|------------------|------------------------------|------------------|
| Variable                                       | stage1           | Variable                     | stage2           |
| Sample size                                    | 12               | Sample size                  | 8                |
| Lowest value                                   | 0.9262           | Lowest value                 | 0.9353           |
| Highest value                                  | 0.9750           | Highest value                | 0.9724           |
| Median                                         | 0.9513           | Median                       | 0.9616           |
| 95% CI for the median                          | 0.9391 to 0.9672 | 95% CI for the median        | 0.9531 to 0.9713 |
| Interquartile range                            | 0.9402 to 0.9660 | Interquartile range          | 0.9591 to 0.9671 |
| <b>Mann-Whitney test (independent samples)</b> |                  |                              |                  |
| Average rank of first group                    | 9.3333           | Average rank of second group | 12.2500          |
| Mann-Whitney U                                 | 34.00            | Test statistic W             | 112.000          |
| Two-tailed probability                         | P = 0.3054       |                              |                  |

Data comparison graph
