# Supplementary material for: Navigating the microbial community in the trachea-oropharynx of breast cancer patients with or without neoadjuvant chemotherapy (NAC) via endotracheal tube: has NAC caused any change?
Source: PeerJ. 2023 Nov 23;11:e16366. doi: 10.7717/peerj.16366 (PMC10676715; doi:10.7717/peerj.16366)
Supplement: Supplemental Information 3 [file peerj-11-16366-s003.xlsx]

## Sheet: main
Group	sample	cytotoxic chemo start date	cytotoxic chemo end date	OP_date	AGE (yrs)	stage	group	Dx_date	height (cm)	weight (kg)	BMI	preOPglucose (mg/dl)	Intubation_time(HH:MM)	Extubation_time(HH:MM)	OP time(mins)	OP time (HH:MM)	Days from last chemotherapy (days)	Chemo duration(days)
NAC	N1	2019-10-23	2020-02-05	2020-03-03	41	2	1	2019-10-07	162.7	66.2	25.0082	105	08:55:00	12:05:00	3:10:00	02:25:00	27	105
NAC	N2	2019-10-12	2020-03-05	2020-03-25	51	2	1	2020-09-30	159.2	91.1	35.9445	114	08:35:00	11:15:00	2:40:00	03:40:00	20	145
NAC	n4	2019-11-25	2020-04-20	2020-05-08	28	2	1	2019-11-11	156	58	23.833	101	08:35:00	11:00:00	2:25:00	03:50:00	18	147
NAC	n5	2020-01-07	2020-04-21	2020-05-13	60	3	1	2019-12-30	156	51	20.9566	133	08:40:00	11:30:00	2:50:00	02:40:00	22	105
NAC	n6	2020-01-03	2020-04-22	2020-05-14	49	3	1	2019-12-20	160	57	22.2656	99	11:40:00	18:25:00	6:45:00	02:50:00	22	110
NAC	n7	2019-12-04	2020-04-07	2020-05-20	28	2	1	2019-12-04	147	52	24.064	89	14:15:00	17:30:00	3:15:00	04:20:00	43	125
NAC	N8	2020-01-29	2020-05-13	2020-06-11	58	3	1	2020-01-10	156	52	21.3675	102	09:50:00	13:40:00	3:50:00	03:00:00	29	105
NAC	N9	2020-02-05	2020-05-22	2020-06-18	63	3	1	2020-01-28	167	66	23.6652	113	11:05:00	18:10:00	7:05:00	07:05:00	27	107
NAC	N10	2020-03-06	2020-06-24	2020-07-16	55	3	1	2020-02-21	168	80	28.3447	112	10:05:00	13:45:00	3:40:00	03:15:00	22	110
NAC	N11	2020-02-14	2020-07-09	2020-07-29	59	3	1	2020-02-02	155	59	24.5578	133	08:50:00	11:30:00	2:40:00	02:40:00	20	146
NAC	N12	2020-08-21	2020-10-26	2020-11-18	55	3	1	2020-08-13	155.9	67.8	27.8957	146	12:40:00	16:50:00	4:10:00	03:10:00	23	66
NAC	N13	2020-07-09	2020-10-29	2020-11-20	61	3	1	2020-07-02	150	47.2	20.9778	105	08:45:00	13:05:00	4:20:00	02:15:00	22	112
NAC	N14	2020-11-20	2021-01-21	2021-02-19	49	3	1	2020-11-12	156	56	23.0112	99	08:45:00	11:40:00	2:55:00	06:45:00	29	62
NAC	N15	2020-11-11	2021-02-23	2021-03-17	52	2	1	2020-11-03	163	67	25.2174	113	11:35:00	13:55:00	2:20:00	02:55:00	22	104
NAC	N16	2020-12-04	2021-03-18	2021-04-07	48	2	1	2020-12-01	162	70	26.6728	112	11:40:00	13:55:00	2:15:00	02:55:00	20	104
NAC	N17	2021-01-15	2021-04-29	2021-05-21	50	3	1	2021-01-07	155	38	15.8169	93	11:50:00	14:45:00	2:55:00	02:40:00	22	104
NAC	N18	2021-02-05	2021-05-27	2021-06-18	54	2	1	2021-01-28	158	51	20.4294	101	12:15:00	14:55:00	2:40:00	02:20:00	22	111
NAC	N19	2021-04-15	2021-09-11	2021-10-01	39	2	1	2021-04-08	164	68	25.2826	98	08:40:00	11:20:00	2:40:00	02:40:00	20	149
NAC	N20	2021-05-15	2021-09-06	2021-10-14	61	3	1	2021-04-23	150	61	27.1111	128	10:30:00	13:30:00	3:00:00	04:10:00	38	114
NAC	N21	2021-06-17	2021-10-01	2021-10-22	55	2	1	2021-06-11	157	71	28.8044	104	10:45:00	13:35:00	2:50:00	02:50:00	21	106
non-NAC	C1			2020-03-12	46	1	2	2020-02-12	158.6	59	23.4556	104	08:45:00	10:45:00	2:00:00	02:00:00
non-NAC	c2			2020-03-19	53	1	2	2020-02-28	167	74	26.5338	99	08:45:00	11:20:00	2:35:00	02:35:00
non-NAC	c3			2020-04-01	43	2	2	2020-03-30	159	62	24.5243	106	08:45:00	12:00:00	3:15:00	03:15:00
non-NAC	C4			2020-04-02	43	2	2	2020-03-11	155	58.8	24.4745	93	09:25:00	13:05:00	3:40:00	03:40:00
non-NAC	C5			2020-04-02	40	2	2	2020-03-19	161.6	50.4	19.2996	110	13:40:00	18:30:00	4:50:00	04:50:00
non-NAC	C6			2020-04-09	61	1	2	2020-04-03	153	51	21.7865	149	08:45:00	12:10:00	3:25:00	03:25:00
non-NAC	C7			2020-04-16	46	2	2	2020-04-08	157	72	29.2101	101	10:00:00	13:30:00	3:30:00	03:30:00
non-NAC	C8			2020-04-17	51	1	2	2020-04-09	168.9	61.3	21.4883	107	13:05:00	15:15:00	2:10:00	02:10:00
non-NAC	C9			2020-04-22	38	1	2	2020-04-13	158.1	51.1	20.4436	111	08:45:00	11:15:00	2:30:00	02:30:00
non-NAC	c10			2020-04-29	52	1	2	2020-04-16	166.2	67.6	24.4729	118	15:00:00	17:20:00	2:20:00	02:20:00
non-NAC	C11			2020-05-15	38	2	2	2020-05-04	155	52	21.6441	105	10:05:00	12:45:00	2:40:00	02:40:00
non-NAC	C12			2020-05-28	60	1	2	2020-05-15	160	70	27.3438	120	12:15:00	16:25:00	4:10:00	04:10:00
non-NAC	C13			2020-05-28	49	2	2	2020-04-29	162	45	17.1468	83	08:45:00	11:45:00	3:00:00	03:00:00
non-NAC	C14			2020-05-29	36	2	2	2020-05-25	152	43	18.6115	103	08:50:00	11:15:00	2:25:00	02:25:00
non-NAC	C17			2020-07-23	45	2	2	2020-07-13	160	57	22.2656	105	10:05:00	15:00:00	4:55:00	04:55:00
non-NAC	C18			2020-07-23	55	1	2	2020-06-24	161	65	25.0762	117	08:45:00	11:50:00	3:05:00	03:05:00
non-NAC	C19			2020-07-29	58	1	2	2020-07-20	160	60	23.4375	128	11:30:00	15:05:00	3:35:00	03:35:00
non-NAC	C20			2020-08-19	49	1	2	2020-08-12	165	70	25.7117	102	10:40:00	13:30:00	2:50:00	02:50:00
non-NAC	C21			2020-09-17	45	1	2	2020-09-01	149	48	21.6206	95	10:50:00	14:15:00	3:25:00	03:25:00
non-NAC	C22			2020-10-08	44	1	2	2020-09-18	157	52	21.0962	98	08:50:00	11:45:00	2:55:00	02:55:00
